RESEARCH ARTICLE

# Prevalence and serotypes of *Salmonella* spp. on chickens sold at retail outlets in Trinidad

Anisa S. Khan<sup>1</sup>✉, Karla Georges<sup>1‡</sup>, Saed Rahaman<sup>2‡</sup>, Woubit Abdela<sup>3‡</sup>, Abiodun A. Adesiyun<sup>1</sup>✉\*

**1** School of Veterinary Medicine, Faculty of Medical Sciences, University of the West Indies, St. Augustine, Trinidad and Tobago, **2** Veterinary Public Health Unit, Ministry of Health, Port of Spain, Trinidad and Tobago, **3** Department of Pathobiology, College of Veterinary Medicine, Nursing and Allied Health, Tuskegee University, Tuskegee, United States of America

✉ These authors contributed equally to this work.

‡ These authors also contributed equally to this work.

\* [Abiodun.Adesiyun@sta.uwi.edu](mailto:Abiodun.Adesiyun@sta.uwi.edu)

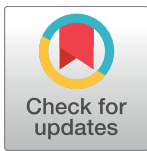

## Abstract

### Background

This cross-sectional study determined the prevalence of *Salmonella* spp. and their serotypes on dressed chicken sold at retail outlets in Trinidad. The study also investigated the risk factors for contamination of dressed carcasses by *Salmonella* spp. at cottage poultry processor outlets where chickens are slaughtered and processed for sale.

### Methods

A total of 133 dressed, whole chickens and 87 chicken parts from 44 cottage poultry processors and 36 dressed, whole chickens and 194 chicken parts from 46 supermarket outlets were randomly collected throughout the country. Isolation and identification of *Salmonella* spp. were performed using standard bacteriological techniques. Serotyping was performed by a regional reference laboratory.

### Results

The prevalence of *Salmonella* spp. in chicken carcasses sampled from cottage poultry processors and supermarkets was 20.5% and 8.3% respectively ( $p < 0.001$ ). The frequency of isolation of *Salmonella* spp. at cottage poultry processors was 22.4%, 23.0%, 7.1%, and 10.0% for non-chilled whole chicken, non-chilled chicken parts, chilled whole chicken and chilled chicken parts respectively. Fresh, non-chilled chicken (22.6%) yielded a higher frequency of isolation of *Salmonella* spp. than chilled chickens (8.3%). For supermarket samples, the frequency of isolation of *Salmonella* spp. was 19.0%, 8.1%, 0.0% and 7.6% for chilled whole chickens, chill chicken parts, frozen whole chicken and frozen chicken parts respectively. The swab method of sampling yielded a statistically significantly ( $p = 0.029$ ) higher frequency (3.2%) of *Salmonella* spp. than the rinse method (1.6%). The predominant serotypes isolated were Kentucky (30.9%) and Javiana (22.7%). Use of chilled water-bath

## OPEN ACCESS

**Citation:** Khan AS, Georges K, Rahaman S, Abdela W, Adesiyun AA (2018) Prevalence and serotypes of *Salmonella* spp. on chickens sold at retail outlets in Trinidad. PLoS ONE 13(8): e0202108. <https://doi.org/10.1371/journal.pone.0202108>

**Editor:** Anderson de Souza Sant'Ana, University of Campinas, BRAZIL

**Received:** April 12, 2018

**Accepted:** July 28, 2018

**Published:** August 23, 2018

**Copyright:** © 2018 Khan et al. This is an open access article distributed under the terms of the [Creative Commons Attribution License](https://creativecommons.org/licenses/by/4.0/), which permits unrestricted use, distribution, and reproduction in any medium, provided the original author and source are credited.

**Data Availability Statement:** All relevant data are within the paper and its Supporting Information files.

**Funding:** This work is supported by the University of the West Indies, St. Augustine Campus Research and Publication Fund Committee [Research grant #2660-457522] awarded to the primary author Anisa Khan and Abiodun Adewale Adesiyun, for Anisa Khan's Master of Philosophy (M.Phil.) program. The funders had no role in study design, data collection and analysis, decision to publish, or preparation of the manuscript.

**Competing interests:** The authors have declared that no competing interests exist.

to cool carcasses was the only risk factor significantly ( $p = 0.044$ ) associated with isolation of *Salmonella* spp.

## Conclusion

Raw chicken carcasses purchased from cottage poultry processors pose a significantly higher risk of contamination with *Salmonella* spp. than those sold at supermarkets.

## Introduction

Globally, despite the institution of several control measures, *Salmonella* infections continue to be problematic with millions of cases occurring annually, both in humans and animals [1]. The annual incidence of human salmonellosis in the world has been estimated to be 93.8 million cases [2].

Poultry products have particularly served as vehicles of *Salmonella* spp. which have caused human and animal diseases as well as economic losses. Worldwide, foodborne infections are under-reported but the problem is exacerbated in developing countries where infections and diseases are often grossly under-reported making it difficult to assess the magnitude of the problem [3]. However, it has been documented that the occurrence of chicken-borne salmonellosis in European Union member states and the United States of America can vary from 15.7% [4] to 85.0% [5] in humans, respectively.

The under-reporting of salmonellosis is of concern particularly in developing countries where diagnostic facilities and qualified personnel required to conduct investigations are inadequate [3, 6]. This has posed challenges in tracing the sources and causative agents implicated in epidemics.

In developing countries, the wet markets or cottage poultry processors serve as important sources of chicken consumed by the population. At these outlets, prevalence rates for *Salmonella* spp. in raw dressed chicken can vary among countries and between outlets as documented in Korea, 42.7% [7], Vietnam, 45.9% [8], India, 65.0% [9], and Malaysia, 100.0% [10]. Poor sanitary practices which are known to be prevalent at these often unregulated outlets that are not monitored by the appropriate authorities have contributed to a high frequency of isolation of *Salmonella* spp. from chicken carcasses [10,11].

Many risk factors have been associated with the isolation of *Salmonella* spp. at the retail outlets, particularly at the wet markets or cottage poultry processors. These include the size of outlets (wet markets, supermarkets and independent poultry stores) [8,11,12], sources of chickens (integrated and non-integrated systems) [12], storage temperature (ambient, chilling and freezing) [8,12], region of the country [13] and chicken rearing types (conventional and organic) [14], amongst other factors.

Commercial outlets, such as supermarkets, also serve as a source of chicken contaminated by *Salmonella* spp. Reported prevalence of *Salmonella* spp. have ranged from 4.0% to 20.0% in developed countries [15,16,17] where stringent measures have been instituted to control salmonellosis on poultry farms and good sanitary practices at poultry processing plants and sale outlets [18,19] compared with 43.0% to 62.5% in developing countries, where such sanitary practices are uncommon [8,20,21,22].

Reported prevalence for *Salmonella* spp. vary globally but these rates are affected by the isolation procedures which have different sensitivity and specificity [23]. Conventional methods have varied both in sample type, i.e. rinse method [24,25,26,27], whole carcass enrichment

[28,29,30] and swab method [10,31], and in the use of non-selective enrichment media [32,33] and selective enrichment media [34].

The serotypes of *Salmonella* spp. isolated from chicken carcasses sampled from retail outlets have varied by country [35,36] but some serotypes such as *S. Enteritidis*, *S. Typhimurium*, *S. Infantis*, *S. Newport*, and *S. Derby* have repeatedly been recovered from chickens and associated with poultry-borne infections or outbreaks in humans [6,15,18]. Some reports have also documented the changes in the predominant serovars, for example from *S. Enteritidis* to *S. Heidelberg* and *S. Kentucky* in the USA [37] and *S. Enteritidis* to *S. Derby* in Uruguay [38], respectively.

Since 1989, *S. Enteritidis* has emerged as pathogen of public health concern in the Caribbean region, causing sporadic cases and outbreaks of diarrhea in both the local and tourist populations [6]. There is a dearth of information on the risk of salmonellosis posed by chicken sold at cottage chicken processors as well as chicken carcasses sold by supermarkets. A study conducted in 2006 [32] reported a prevalence of 7.3% for *Salmonella* spp. from chicken at selected cottage processing outlets and another study reported a prevalence of 71.4% for *Salmonella* spp. in chicken from cottage processors in one region of the country [39]. However, both studies did not evaluate the risk factors for *Salmonella* contamination at these outlets. In 2012, Dookeran et al. [40] observed that broiler carcass contamination with *Salmonella* spp. increased during transportation from the farm to the processing plant, during processing and at retail outlets. Moreover, there are no data on the prevalence of *Salmonella* contamination of chicken meat sold by supermarkets in the country.

In Trinidad and Tobago, cottage poultry processors and supermarkets have been reported to be the source of 55% and 45% respectively of the chicken consumed in the country [39]. To date, there is a lack of current information on the prevalence and characteristics of *Salmonella* spp. from both types of retail outlets (cottage poultry processors and supermarkets). Therefore, the objectives of this study are to determine the prevalence and serotypes of *Salmonella* spp. in dressed broiler meat sold at retail outlets in Trinidad. The study also assesses the risk factors for *Salmonella* contamination of broiler carcasses at the cottage processing outlets.

## Methods

### Consent of the owners of cottage processor outlets and Ethics Committee approval

The consent of the owners of the Cottage Processor outlets were obtained before they completed the questionnaires and chickens were purchased for the study. In addition, the Ethics Committee of the Faculty of Medical Sciences, University of the West Indies, St. Augustine, approved the protocol before the study commenced.

### Retail outlets for broiler chickens in Trinidad and Tobago

The retail outlets included in this study comprised primarily the cottage poultry processors also known as 'pluck shops' and supermarkets.

Cottage poultry processors are roadside establishments that slaughter and process poultry for customers on request, providing fresh whole chickens or chicken parts (cut-up whole chickens). Most of these outlets offer for sale recently slaughtered chickens while a few sell chilled chickens. At the supermarkets, only chilled and frozen chicken carcasses or parts are sold.

The 'pluck shops' are conveniently located throughout each county across the country. The operations at these outlets comprise a pen or area where birds are kept prior to slaughter,

plastic or galvanize cones that hold the birds prior to and after severing of the jugular vein, large pots/vessels with hot water for scalding birds prior to defeathering, defeathering machine/drums, counter-tops where carcasses are eviscerated and sink/container where carcasses are rinsed with tap water. Some establishments utilize a chilled/iced water bath to cool carcasses before they packaged for sale. Practices at these outlets are often not monitored by the designated authority due to manpower shortage.

Supermarkets are outlets of various sizes that retail poultry meat along with other products. Chicken carcasses originate from local commercial chicken processing plants, where meat inspectors from the Veterinary Public Health Unit conduct routine inspection. Some supermarkets also retail chicken carcasses from other countries.

### Location of broiler chicken retail outlets

Retail outlets were located and identified from the information provided by the Poultry Surveillance unit, Veterinary Public Health Unit and Association of Supermarket owners. Overall, a total of 265 cottage poultry processor outlets and 125 supermarkets and their locations were identified.

### Sources and number of samples studied

The number of samples collected for the study was estimated using the formula for estimating prevalence for an infinite population size [41] and the estimated minimum sample size was determined to be 384. However, a total of 450 samples were collected. They were represented by 220 samples from outlets of cottage poultry processors and 230 samples from supermarkets. The sampling unit at each retail outlet was five dressed chickens, comprising whole carcasses and chicken parts.

### Selection of retail outlets for the study

The cottage processor outlets were selected based on proportional sampling from each of the seven counties in Trinidad using simple random sampling method. Overall, a total of 44 cottage processing outlets were selected. Supermarkets were categorized into sizes based on the number of cashiers at each establishment and the selection from each group were done using proportional sampling and simple random sampling method within each group of supermarkets.

For the study, 46 supermarkets comprising 18, 14, 9 and 5 outlets classified as chain supermarkets (more than 1 outlet), large supermarkets (4 or more cash registers), medium supermarkets (2–3 cash registers) and small supermarkets (1 cash register only) were included in the sampling plan.

### Administration of questionnaire

At each selected cottage processor outlet, consenting owners, after being briefed about the project, were administered a questionnaire to elicit information on demographic data and risk factors for carcass contamination with *Salmonella* spp. These included the number of workers employed, levels of workers' training, experience of workers, source of live birds, sale activity, sanitary practices (scored by a sanitation score sheet: [S1 Appendix](#)), and presentation of the carcasses at outlets. The detailed questionnaire is available in [S2 Appendix](#). At supermarkets, information obtained included the source of chickens (processing plants) and presentation (chilled or frozen) for sale.

## Processing of samples

At each retail outlet, the five chicken carcasses were collected in separate sterile bags and transported on ice to the laboratory for processing within 3 h. In the laboratory, the initial processing of the carcasses or carcass parts followed the procedure described by Rodrigo et al. [32]. Subsequently the chicken samples were each processed using both the carcass swabs and carcass rinse water.

**Swab method.** A slight modification of earlier reported carcass swab-sampling method [42] was used. Internal and external swabs of each carcass were taken using sterile cotton swabs and placed in 9 ml Buffered Peptone Water (BPW) (Oxoid, Hampshire, England).

**Rinse method.** The same carcasses that were swabbed were then processed by a carcass rinse method [26,32], a process different from the whole carcass enrichment method [29]. Six milliliters of Phosphate Buffered Saline (PBS, pH 7.2) per gram of carcass weight was placed in a sterile bag and the carcass was massaged and rotated no less than 25 times. From the resulting rinsate, 25 ml were aseptically collected and centrifuged at 4470 g for 20 minutes after which 1 ml of sediment was removed and transferred to 9 ml BPW.

## Non-selective and selective enrichments of samples

Both pre-enriched BPW samples (swab and rinse method) were incubated at 37°C for 18–24 h. The samples in enrichment media were then selectively enriched in tetrathionate (TT) broth (Oxoid, Hampshire, England) and Rappaport-Vassiliadis Soya (RVS) broth (Oxoid, Hampshire, England) and incubated for 18–24 h at 37 and 42°C respectively.

## Isolation and identification of *Salmonella* serotypes

Samples enriched in the selective media (TT and RVS) were sub-cultured onto xylose lysine tergitol 4 (XLT-4; Oxoid, Hampshire, England) and brilliant green agar (BGA; Oxoid) and incubated aerobically at 37°C for 18–24 h. Suspected *Salmonella* colonies (pink isolated colonies on BGA, red colonies with black centers on XLT-4) were subjected to biochemical tests for identification of *Salmonella* spp. using standard methods [43]. All isolates biochemically confirmed to be *Salmonella* spp. were subjected to serological typing using *Salmonella* polyvalent antiserum (A-I and Vi, Difco, Detroit, MI). Complete confirmation and serotyping of *Salmonella* isolates representative of those recovered by the carcass rinse/swab, RVS/TT and BGA/XLT-4 methods were done at the Public Health Laboratory, Ministry of Health, Barbados.

## Statistical analyses

Chi-square analyses were conducted using the Statistical Package for Social Sciences, SPSS (version 23, IBM Corp., Somers, NY) to determine whether there were statistically significant differences in the frequency of isolation of *Salmonella* spp. amongst (i) risk factors associated with *Salmonella* contamination, (ii) types of outlets (cottage poultry processors/supermarkets), (iii) carcass presentation (whole chicken/chicken parts), (iv) temperature at point of sale (ambient/chilling/freezing temperatures), and (v) method of bacterial isolation (carcass swab/carcass rinse).

The level of significance was determined at an alpha level of 0.05. Additionally, a mixed effects logistic regression model was constructed with the presence of *Salmonella* in carcasses sampled as the outcome variable and supermarket size (large *versus* others) and whether it was a chain or not, as covariates. The supermarket identification was set a random variable to determine the degree of clustering. For cottage processors, county was used as covariates and

cottage processor identification was set as a random variable. The intra-cluster correlation coefficient (ICC) was calculated to measure the proportion of variation between groups as a measure of the total between and with group variation. Data was analysed using STATA 12 (STATA Corporation, College Station Texas).

## Results and discussion

The relationship of the frequency of isolation of *Salmonella* and eight risk factors studied at the outlets of cottage operators are shown in Table 1. The only factor that had statistically significant association with isolation of *Salmonella* spp. was the use of chilled water-baths to cool carcasses post-slaughter. In this study, carcasses purchased from outlets that used chilled water

**Table 1. Risk factors for contamination of chicken carcasses by *Salmonella* spp. at outlets of cottage poultry processors in Trinidad.**

| Risk Factor                                        | No. of cottage poultry processor outlets sampled | No. (%) positive for <i>Salmonella</i> spp. | P-value |
|----------------------------------------------------|--------------------------------------------------|---------------------------------------------|---------|
| <b>Sale activity<sup>a</sup>: Weekday</b>          |                                                  |                                             | 1       |
| Medium                                             | 25                                               | 9 (36.0)                                    |         |
| Large                                              | 18                                               | 6 (33.3)                                    |         |
| <b>Sale activity: Weekends</b>                     |                                                  |                                             | 1       |
| Medium                                             | 24                                               | 8 (33.0)                                    |         |
| Large                                              | 20                                               | 7 (35.0)                                    |         |
| <b>Source of live birds</b>                        |                                                  |                                             | 0.801   |
| Source A                                           | 11                                               | 2 (18.2)                                    |         |
| Source B                                           | 21                                               | 6 (28.6)                                    |         |
| Source C                                           | 10                                               | 4 (40.0)                                    |         |
| Source D                                           | 21                                               | 7 (33.3)                                    |         |
| Source Others                                      | 13                                               | 5 (38.5)                                    |         |
| <b>Frequency of changing of rinse water</b>        |                                                  |                                             | 1       |
| Every 20 birds or less                             | 27                                               | 9 (33.3)                                    |         |
| Every 21 birds and greater                         | 17                                               | 6 (35.3)                                    |         |
| <b>Frequency of general cleaning of work area</b>  |                                                  |                                             | 1       |
| Once daily                                         | 32                                               | 11 (34.4)                                   |         |
| More than once daily                               | 12                                               | 4 (33.3)                                    |         |
| <b>Frequency of thorough cleaning of work area</b> |                                                  |                                             | 1       |
| At least once a week                               | 29                                               | 10 (34.5)                                   |         |
| Less than once a week                              | 15                                               | 5 (33.3)                                    |         |
| <b>Frequency of cleaning pens</b>                  |                                                  |                                             | 0.761   |
| At least once every 3 weeks                        | 15                                               | 5 (33.3)                                    |         |
| Every 1–6 months                                   | 13                                               | 6 (46.2)                                    |         |
| <b>Use of chilled water bath</b>                   |                                                  |                                             | 0.044   |
| Yes                                                | 9                                                | 6 (66.7)                                    |         |
| No                                                 | 35                                               | 9 (25.7)                                    |         |
| <b>Chicken sale from counter</b>                   |                                                  |                                             | 0.976   |
| Yes                                                | 16                                               | 6 (37.5)                                    |         |
| No                                                 | 28                                               | 9 (32.1)                                    |         |

<sup>a</sup> Medium; <350 birds; Large, 351 or more birds.

<https://doi.org/10.1371/journal.pone.0202108.t001>

had significantly higher prevalence of *Salmonella* spp. (66.7%) compared to outlets that did not (25.7%). It is significant that the chilling water-bath often contained stagnant water, which if not frequently changed, may result in a buildup of contamination and cross-contamination of carcasses with *Salmonella* spp. and other pathogens. This agrees with published results particularly in road-side poultry processing outlets as reported by others [11, 20, 44, 45]. Infrequent change of chilling water may also lead to an increase of the temperature of the chilling water tank as warm carcasses are constantly added. It has been reported that high temperature of the water bath for chilling may also lead to multiplication of bacteria [46].

Although the frequency of isolation of *Salmonella* spp. across broiler farm sources ranged from 18.2% (Source A) to 40.0% (Source C), the differences were however not statistically significant ( $P > 0.05$ ;  $X^2$ ). This study is not in agreement with Donado et al. [47] who reported that the source (integrated versus non-integrated) of live chickens from retail outlets in Columbia significantly affected the frequency of isolation of *Salmonella* spp. from chicken carcasses. This may be explained, in part, by the apparent low prevalence of *Salmonella* spp. in live chickens from broiler farms in the country, ranging from 0.0% to 5.0% [48]. In our study the practices observed at the outlets resulting in cross-contamination, due to the use of chilled water-baths, may be more important contributors to carcass contamination than sources of live chickens. Nidaullah et al. [10] reported a high prevalence of *Salmonella* spp. in carcasses due to cross contamination throughout the various stages of processing at wet markets. Rivera-Perez et al. [49] also investigated the risk points during broiler carcass processing and reported that *Salmonella* contamination increased from 10% to 40% during evisceration and subsequent spray washing.

Of a total of 44 cottage processor outlets sampled across the seven counties, the frequency of isolation of *Salmonella* spp. was 34.1% (15/44). In each county (7/7; 100.0%) samples positive for *Salmonella* were found. (Table 2). The range of outlet positivity for *Salmonella* spp. was from 21.4% (Victoria) to 75.0% (Nariva/Mayaro) ( $p = 0.650$ ). A study conducted in 2006 in the county of Mayaro [39] reported a prevalence of 71.4% for *Salmonella* spp. at broiler retail outlets, which agrees with our study.

At supermarkets, there was no difference in the odds of isolating *Salmonella* from large supermarkets versus other types of establishments or chain outlets. An ICC of  $0.22 < 95\% \text{ CI, } 0.18\text{--}0.737 >$  was calculated, which indicates that 22% of the variation in detecting *Salmonella* is due to between supermarket factors and 78% is explained by differences within supermarkets.

As for cottage chicken processors, there was no difference in the odds of detecting *Salmonella* according to county in which the cottage processor outlet was located. An ICC of  $0.80 < 95\% \text{ CI, } 0.63\text{--}0.91 >$  was calculated which indicates that 80% of the variation in the detection of *Salmonella* in chickens sampled is explained between cottage chicken outlets and 20% is within samples from these cottage chicken outlets. This indicates a high level of clustering in the isolation of *Salmonella* at the level of the outlets.

Of a total of 220 chickens sampled from cottage poultry processors, 45 (20.5%) were positive for *Salmonella* spp. using both the carcass rinse and carcass swab methods. In a study conducted in 2006 using only the rinse method, Rodrigo et al. [32] reported a considerably higher prevalence of *Salmonella* spp. (7.3%) for broilers sampled from cottage poultry processors ('pluck shops') compared to a prevalence of only 2.3% (5/220) in the current study using a similar rinse method. Cox et al. [50] reported that there may be an increase or decrease in prevalence based on sampling technique and methods used.

In the current study, the frequency of isolation of *Salmonella* spp. from carcasses ranged from 6.7% (county St. Andrew/St. David) to 55.0% (county Nariva/Mayaro). The differences were statistically significant ( $P < 0.05$ ). However, different results were obtained by Rodrigo

**Table 2. Frequency of isolation of *Salmonella* spp. from broilers sold at retail outlets across Trinidad.**

| Type of retail outlet      | County                | Total No. of Cottage poultry processors <sup>a</sup> | No. (%) of Cottage poultry processors sampled | No. (%) of Cottage poultry processors positive for <i>Salmonella</i> spp. <sup>b</sup> | P-value | No. of chickens tested | No. (%) of chickens positive for <i>Salmonella</i> spp. <sup>b</sup> | P-value |
|----------------------------|-----------------------|------------------------------------------------------|-----------------------------------------------|----------------------------------------------------------------------------------------|---------|------------------------|----------------------------------------------------------------------|---------|
| Cottage poultry processors | St George Central     | 17                                                   | 3 (17.6)                                      | 1 (33.3)                                                                               | 0.65    | 15                     | 5 (33.3)                                                             | <0.05   |
|                            | St George East        | 27                                                   | 5 (18.5)                                      | 2 (40.0)                                                                               |         | 25                     | 4 (16.0)                                                             |         |
|                            | St Andrew/St David    | 19                                                   | 3 (15.8)                                      | 1 (33.3)                                                                               |         | 15                     | 1 (6.7)                                                              |         |
|                            | Nariva/Mayaro         | 23                                                   | 4 (17.4)                                      | 3 (75.0)                                                                               |         | 20                     | 11 (55.0)                                                            |         |
|                            | Caroni                | 40                                                   | 7 (17.5)                                      | 2 (28.6)                                                                               |         | 35                     | 3 (8.6)                                                              |         |
|                            | Victoria              | 91                                                   | 14 (15.4)                                     | 3 (21.4)                                                                               |         | 70                     | 10 (14.3)                                                            |         |
|                            | St Patrick            | 48                                                   | 8 (16.7)                                      | 3 (37.5)                                                                               |         | 40                     | 11 (27.5)                                                            |         |
| Sub-Total                  | 265                   | 44 (16.6)                                            | 15 (34.1)                                     |                                                                                        | 220     | 45 (20.5)              |                                                                      |         |
| Supermarkets               | Group of supermarkets | Total No. of supermarkets <sup>c</sup>               | No. (%) of supermarkets sampled               | No. (%) of supermarkets positive for <i>Salmonella</i> spp. <sup>b</sup>               | P value | No. of chickens tested | No. (%) of chickens positive for <i>Salmonella</i> spp. <sup>b</sup> | P value |
|                            | Chain                 | 74                                                   | 18 (24.3)                                     | 3 (16.7)                                                                               | 0.107   | 90                     | 4 (4.4)                                                              | 0.023   |
|                            | Large                 | 18                                                   | 14 (77.8)                                     | 7 (50.0)                                                                               |         | 70                     | 11 (15.7)                                                            |         |
|                            | Medium                | 17                                                   | 9 (52.9)                                      | 1 (11.1)                                                                               |         | 45                     | 1 (2.2)                                                              |         |
|                            | Small                 | 16                                                   | 5 (31.3)                                      | 2 (40.0)                                                                               |         | 25                     | 3 (12.0)                                                             |         |
|                            | Subtotal              | 125                                                  | 46 (36.8)                                     | 13 (28.3)                                                                              |         | 230                    | 19 (8.3)                                                             |         |
|                            | Total                 | 390                                                  | 90 (23.1)                                     | 28 (31.1)                                                                              |         | 450                    | 64 (14.2)                                                            |         |

<sup>a</sup>Total number of cottage poultry processors in Trinidad.

<sup>b</sup>Based on the use of both rinse and swab methods.

<sup>c</sup>Group of supermarkets: Chain- supermarket having more than one (1) outlet; Large- supermarket having 4 or more cash registers; Medium- supermarket having 2–3 cash registers; Small- supermarket having only 1 cash register.

<https://doi.org/10.1371/journal.pone.0202108.t002>

et al. [32] that reported a prevalence of 25.0% in county St. Andrew/St. David and 0.0% in counties Caroni and Victoria and 8.3% in county Nariva/Mayaro. The differences between the two studies could be due, in part, to a true difference in prevalence or differences in methodologies. There have been several reports of higher sensitivity for the isolation of *Salmonella* spp. with buffered peptone water (BPW), Rappaport Vassiliadis Soya broth (RVS) and xylose-lysine decarboxylate- 4 (XLT-4) [51,52,53] compared to the media used in the study by Rodrigo et al. [32]. The implication of our finding is that chicken purchased at cottage poultry processors in county Nariva/Mayaro pose a higher risk of exposure to *Salmonella* spp. to consumers if improperly cooked. The frequency of isolation of *Salmonella* spp. from broilers from cottage poultry processors in Trinidad and Tobago is lower than those reported for wet markets and similar outlets in Nepal, 38.0% [54], Vietnam, 48.9% [8], China, 52.2% [11], Bangalore- India, 65.0% [9] and Malaysia; 100% [10].

Of a total of 46 supermarkets visited, 13 samples (28.3%) yielded *Salmonella* spp. with a range of 11.1% (Medium-sized outlets) to 50% (Large-sized outlets) (p = 0.107). Nineteen (8.3%) of 230 chicken carcasses sampled were positive for *Salmonella* spp. (p = 0.023). Studies conducted at supermarket outlets elsewhere have documented higher prevalence of *Salmonella* spp. as in Vietnam, 43.0% [55] and in China, 51.2% [11] where large supermarkets accounted for 50.3% and small supermarkets, 52.1% of the positive samples, respectively. The differences may be accounted for by many factors including high prevalence of *Salmonella* spp. in live



broilers at slaughter, hygienic practices during slaughter at the wet markets [10,55] and sensitivity of the laboratory techniques used in the isolation of the organism [56].

It is important for food safety to have detected that the prevalence (20.5%) of *Salmonella* spp. from cottage processor outlets was statistically significantly higher ( $P < 0.05$ ) than the prevalence found in supermarkets (8.3%). Therefore, chicken carcasses purchased from cottage poultry processors in Trinidad pose a higher risk of salmonellosis than those that originate from supermarkets. On the contrary, studies conducted by Yang et al. [11] in China and Ta et al. [8] in Vietnam reported no significant differences in the isolation rates from chickens sampled at wet markets and supermarkets. The reason for the higher isolation rate at cottage poultry processors could be due to cross contamination resulting from poor hygiene and manual handling of the chicken during processing thereby exacerbating cross contamination [10]. Additionally, the lower isolation rate from supermarkets in our study may be because most of the broiler chickens sold in supermarket outlets originated from commercial processing plants where sanitary practices are enforced by personnel of the Veterinary Public Health unit while no such quality control occurs at the cottage processor outlets.

Overall, 64 (14.2%) of 450 chicken samples from retail outlets (cottage poultry processors and supermarkets) were positive for *Salmonella* spp., a prevalence at the lower end of the 12–85% range for isolation of the pathogen from retail outlets worldwide [57].

The effects of the temperature (fresh/non-chilled, chilled and frozen) and type (whole and parts) of chicken carcasses presented for sale at the retail outlets on the frequency of isolation of *Salmonella* spp. are shown in Table 3. The range of isolation of *Salmonella* spp. based on temperature was from 0.0% for frozen chickens to 22.6% for fresh, non-chilled chickens ( $P > 0.05$ ). Of 190 fresh, non-chilled carcasses sampled, 43 (22.6%) were positive for *Salmonella* spp. whereas only 2 (8.3%) of 24 chilled carcasses sampled were contaminated by the pathogen ( $P > 0.05$ ). A possible reason for the lower isolation rate with a decrease in temperature could be because low temperatures have been reported to have bacteriostatic potential thereby causing injury to the bacterial cell wall, limiting its proliferation in non-selective and selective media [58]. In a review of 18 studies done worldwide, Huda et al. [57] reported that the highest contamination potential with *Salmonella* for chicken stored at room temperature was 37%

**Table 3. Frequency of isolation of *Salmonella* spp. by presentation and temperature conditions at which chicken carcasses are kept at cottage poultry processors and supermarket outlets.**

| Type of retail outlet      | Non-chilled                  |                       |                                                          | Chilled               |                                                          |         | Frozen                |                                                          |         | All types             |                                                          |
|----------------------------|------------------------------|-----------------------|----------------------------------------------------------|-----------------------|----------------------------------------------------------|---------|-----------------------|----------------------------------------------------------|---------|-----------------------|----------------------------------------------------------|
|                            | Type of chicken presentation | No. of samples tested | No. (%) positive for <i>Salmonella</i> spp. <sup>a</sup> | No. of samples tested | No. (%) positive for <i>Salmonella</i> spp. <sup>a</sup> | P-value | No. of samples tested | No. (%) positive for <i>Salmonella</i> spp. <sup>a</sup> | P-value | No. of samples tested | No. (%) positive for <i>Salmonella</i> spp. <sup>a</sup> |
| Cottage poultry processors | Whole                        | 116                   | 26 (22.4)                                                | 14                    | 1 (7.1)                                                  | 0.327   | 3                     | 0 (0.0)                                                  | NA      | 133                   | 27 (20.3)                                                |
|                            | Parts                        | 74                    | 17 (23.0)                                                | 10                    | 1 (10.0)                                                 | 0.635   | 3                     | 0 (0.0)                                                  |         | 87                    | 18 (20.7)                                                |
|                            | Total                        | 190                   | 43 (22.6)                                                | 24                    | 2 (8.3)                                                  | 0.176   | 6                     | 0 (0.0)                                                  |         | 220                   | 45 (20.5)                                                |
|                            | P-value                      |                       | 1                                                        |                       | 0.804                                                    |         |                       | NA                                                       |         |                       | 1                                                        |
| Supermarkets               | Whole                        | NA                    | NA                                                       | 21                    | 4 (19.0)                                                 | NA      | 15                    | 0 (0.0)                                                  | 0.125   | 36                    | 4 (11.1)                                                 |
|                            | Parts                        | NA                    | NA                                                       | 37                    | 3 (8.1)                                                  | NA      | 157                   | 12 (7.6)                                                 | 1       | 194                   | 15 (7.7)                                                 |
|                            | Total                        | NA                    | NA                                                       | 58                    | 7 (12.1)                                                 | NA      | 172                   | 12 (7.0)                                                 | 0.097   | 230                   | 19 (8.3)                                                 |
|                            | P-value                      | NA                    | NA                                                       |                       | 0.241                                                    |         |                       | 0.603                                                    |         |                       | 0.51                                                     |

NA: Not applicable.

<sup>a</sup>Based on the use of both rinse and swab methods.

<https://doi.org/10.1371/journal.pone.0202108.t003>

with a lower and upper average of 24–29%. This is slightly higher than the 22.6% isolation rate detected in our un-chilled carcasses. Additionally, the authors reported that contamination of chicken stored at chilled and frozen temperatures were 34 and 35%, respectively. These findings are however higher than those detected in our study, where chilled and frozen chickens yielded *Salmonella* spp. at a rate of 8.3% and 0.0%, respectively. The differences in the duration of storage of chicken carcasses at ambient and chilling temperatures, which were not investigated in the current study, may also be responsible, in part, for our findings. Ta et al. [8] also failed to detect significant differences in the isolation rate of the organism with respect to storage temperatures (room temperature and chilled products), in agreement with our findings.

A comparison of the type of presentation (whole and part) of carcasses sampled from cottage processor outlets, revealed *Salmonella* isolation rates of 20.3% (27/133) and 20.7% (18/87) from whole carcasses and carcass parts, respectively ( $P > 0.05$ ). This suggests that the practice of cutting whole chickens into parts did not significantly increase *Salmonella* contamination.

For the samples collected from supermarket outlets where fresh, non-chilled chickens were not sold, the frequency of isolation of *Salmonella* spp. was 12.1% (7/58) for chilled carcass samples compared with 7.0% (12/172) for frozen carcasses but the difference was not statistically significant ( $p = 0.097$ ). Considering the possible effect of temperature on types of presentation, for whole carcass samples the frequency of isolation from chilled chicken was 19.0% (4/21) compared to 0.0% (0/15) for frozen whole chicken but the difference was not statistically significant ( $p = 0.125$ ). As for chicken parts, the frequency of isolation of *Salmonella* spp. was 8.1% (3/37) and 7.6% (12/157) for chilled chicken and frozen chicken respectively and the difference was not statistically significant ( $p = 1$ ). *Salmonella* was isolated from 4 (11.1%) of the 36 whole carcasses and from 15 (7.7%) of the 194 frozen part samples but the difference was not statistically significant ( $p = 0.510$ ). Since the minimum growth temperature for *Salmonella* on poultry meat is 5°C, with an optimum temperature ranging between 35–43°C [59], this could have contributed to the difference in isolation rates based on storage conditions. Morris and Wells [60] reported an increase in isolation rate from chilled carcasses rotated in an ice slush and suggested that extensive contact between carcasses may have contributed to cross-contamination. Additionally, Ahmed et al. [58] found that freezing below -18°C of *Salmonella*-positive carcasses eliminated its presence and suggested this was due to the low temperature damaging the bacterial cell wall leading to the death of the pathogen. Contrary to the previously mentioned studies and similar to our results, Yang et al. [11] found no significant difference between storage temperature and the isolation of *Salmonella* on raw poultry in China.

Of the 203 chicken samples of local origin collected from supermarket outlets, 18 (8.9%) were positive for *Salmonella* spp. while of the 27 samples of foreign origin, only 1 (3.7%) was positive ( $p = 0.707$ ). The difference in frequency of isolation of *Salmonella* spp. from chicken obtained from local processing plants compared with those from plants in the USA sources, although not statistically significant, may reflect the fact that local chickens offered for sale at supermarkets originate from processing plants where thorough poultry inspection and sanitary practices are enforced, similar to that in the USA. The majority of imported poultry products to Trinidad originate from the USA.

The frequency of isolation of *Salmonella* spp. from chickens reared under the conventional production system was 8.1% (17/209), therefore similar ( $p = 0.687$ ) to that observed for organically reared chickens (9.5%; 2/21). The low sample size of organically-reared chickens available for sampling in the current study was primarily because this is not a common practice in the country.

For chicken samples collected from supermarket outlets, the frequency of isolation of *Salmonella* spp. was similar for the rinse method (3.9%) and the swab method (3.5%) and the difference was not statistically significant ( $p = 1$ ) as shown in Table 4. However, for chicken

Table 4. Frequency of isolation of *Salmonella* spp. by the rinse and swab methods.

| Source of sample           | Types of sample processed | No. of samples tested | No. (%) positive for <i>Salmonella</i> spp. by: |             |         |          |
|----------------------------|---------------------------|-----------------------|-------------------------------------------------|-------------|---------|----------|
|                            |                           |                       | Rinse method                                    | Swab method | P-value | Total    |
| Supermarkets               | Whole chicken             | 58                    | 2 (3.4)                                         | 5 (8.6)     | 0.438   | 7 (6.0)  |
|                            | Parts                     | 172                   | 7 (4.1)                                         | 3 (1.7)     | 0.336   | 10 (2.9) |
|                            | Sub total                 | 230                   | 9 (3.9)                                         | 8 (3.5)     | 1       | 17 (3.7) |
|                            | P-value                   |                       |                                                 |             | 0.057   |          |
| Cottage poultry processors | Whole chicken             | 133                   | 3 (2.3)                                         | 15 (11.3)   | 0.007   | 18 (6.8) |
|                            | Parts                     | 87                    | 2 (2.3)                                         | 6 (6.9)     | 0.278   | 8 (4.6)  |
|                            | Sub total                 | 220                   | 5 (2.3)                                         | 21 (9.5)    | 0.002   | 26 (5.9) |
|                            | P-value                   |                       |                                                 |             | 0.195   |          |
| Total                      | Whole chicken             | 191                   | 5 (2.6)                                         | 20 (10.5)   | 0.004   | 25 (6.5) |
|                            | Parts                     | 259                   | 9 (3.5)                                         | 9 (3.5)     | 1       | 18 (3.5) |
|                            | Sub total                 | 450                   | 14 (1.6)                                        | 29 (3.2)    | 0.029   | 43 (4.8) |
|                            | P-value                   |                       |                                                 |             | 0.004   |          |

<https://doi.org/10.1371/journal.pone.0202108.t004>

samples from cottage poultry processors, the swab method (9.5%) was more sensitive ( $p = 0.002$ ) than the rinse method (2.3%). Overall, the swab method was determined to be a more sensitive method, 3.2% (29/450) than the rinse method, 1.6% (14/450,  $p = 0.029$ ).

In addition, the swab method yielded significantly a higher isolation rate for *Salmonella* spp. in whole chicken sampled at cottage poultry processors (11.3%; 15/133) versus the rinse method (2.3%; 3/133). Overall, for whole chicken samples (supermarkets and cottage poultry processors), 10.5% (20/191) were positive for *Salmonella* spp. by the swab method compared to 2.6% (5/191) by the rinse method ( $p = 0.004$ ). The finding that there was no statistically significant difference in the isolation rate of *Salmonella* spp. by the two methods for the samples collected at the supermarkets, together with the lower frequency of isolation, may suggest differences in the quantitative level of contamination between meats sold at supermarkets and cottage poultry processors. Swab method is used for environmental sampling [10] and large animal studies where the entire carcass cannot be used for testing. Whilst the swab techniques are commonly reported to focus on one site, there have been reports where two or three sites and whole swab techniques were compared and it was found that multi-site swabbing yielded significantly higher isolation rates of bacteria compared with the swabbing of one site only [31, 61]. Additionally, whole carcass sampling via rinsing or swabbing was deemed necessary for optimum *Salmonella* recovery [31]. The findings in our study are however at variance with other studies which suggest that the swab method is not as sensitive as other methods such as excision of skin/muscle tissue or rinsing [42, 62].

The serotypes of *Salmonella* spp. isolated from the retail outlets were compared based on the type of samples collected (Table 5). Of a total of 68 isolates of *Salmonella* spp. from cottage processor outlets, 10 different serotypes were identified while 6 serotypes were identified among the 29 isolates from supermarket outlets. Whole carcasses accounted for 58.8% and 17.2% of the serotypes recovered from samples collected from the cottage poultry processors and supermarkets, and 38.2% and 82.8% for chicken parts respectively. The predominant serotypes detected at cottage poultry processors were *S. Javiana* (30.9%; 21/68), *S. Kentucky*; 23.5%; 16/68) and *S. Manhattan* (16.2%; 11/68) whereas at supermarkets *S. Kentucky*, *S. sub-species enterica I* and *S. San Diego* accounted for 47.3%, 27.6% and 10.3% of the serotypes, respectively.

Table 5. Serotypes of *Salmonella* spp. isolated from retail outlets and by type of sample.

| Type of outlet            | Serotype              | No. (%) of isolates    | Type of sample |               |
|---------------------------|-----------------------|------------------------|----------------|---------------|
| Cottage poultry processor | Javiana               | 11 (16.2)              | Whole carcass  |               |
|                           | Kentucky              | 10 (14.7)              | Whole carcass  |               |
|                           | Manhattan             | 7 (10.3)               | Whole carcass  |               |
|                           | Warragul <sup>a</sup> | 5 (7.4)                | Whole carcass  |               |
|                           | subspecies enterica I | 2 (2.9)                | Whole carcass  |               |
|                           | Group D               | 2 (2.9)                | Whole carcass  |               |
|                           | Bloomsbury            | 2 (2.9)                | Whole carcass  |               |
|                           | Group C               | 1 (1.5)                | Whole carcass  |               |
|                           | Javiana               | 10 (14.7)              | Chicken parts  |               |
|                           | Kentucky              | 6 (8.8)                | Chicken parts  |               |
|                           | Manhattan             | 4 (5.9)                | Chicken parts  |               |
|                           | Aberdeen              | 3 (4.4)                | Chicken parts  |               |
|                           | Warragul <sup>a</sup> | 2 (2.9)                | Chicken parts  |               |
|                           | Schwarzengrund        | 1 (1.5)                | Chicken parts  |               |
|                           | Subtotal              | 68 (70.1) <sup>b</sup> | Chicken parts  |               |
|                           | Supermarket           | Kentucky               | 4 (13.8)       | Whole carcass |
|                           |                       | Javiana                | 1 (3.4)        | Whole carcass |
| Kentucky                  |                       | 10 (34.5)              | Chicken parts  |               |
| subspecies enterica I     |                       | 8 (27.6)               | Chicken parts  |               |
| San Diego                 |                       | 3 (10.3)               | Chicken parts  |               |
| Montevideo                |                       | 2 (6.9)                | Chicken parts  |               |
| Westhampton               |                       | 1 (3.4)                | Chicken parts  |               |
| Subtotal                  |                       | 29 (29.9) <sup>c</sup> | Chicken parts  |               |
| Total                     |                       | 97                     |                |               |

<sup>a</sup> Possible *Salmonella* Warragul

<sup>b</sup> Of a total of 68 isolates

<sup>c</sup> Of a total of 29 isolates

<https://doi.org/10.1371/journal.pone.0202108.t005>

At cottage poultry processors, serotypes *S. subspecies enterica* I, *S. Group D*, *S. Bloomsbury* and *S. Group C* were detected in whole carcasses but not in chicken parts, whereas serotypes *S. Aberdeen* and *S. Schwarzengrund* were detected in chicken parts and not in whole carcasses.

At supermarkets, the serotypes detected differed between the types of sample, with *S. Javiana* being detected in whole carcasses but not in chicken parts. Serotypes detected in chicken parts but not in whole carcasses included *S. subspecies enterica* I, *S. San Diego*, *S. Montevideo* and *S. Westhampton*. Overall, serotypes detected in whole carcasses alone included *S. Group D*, *S. Bloomsbury* and *S. Group C* while serotypes being detected in chicken parts alone comprised *S. Aberdeen*, *S. Schwarzengrund*, *S. San Diego*, *S. Montevideo* and *S. Westhampton*. The differences in the serotypes of *Salmonella* spp. between the different type of sample could have been due to differences in origin and source of broiler chickens, for example importation, which were not determined in the current study.

Previous studies conducted in the country and the Caribbean region on broilers, layers and eggs have detected several serotypes. Notably Rodrigo et al. [32] reported isolation of serotypes *S. Kiambu*, *S. Kentucky* and *S. Mbandaka* in broilers, whereas Adesiyun et al. [48] detected *S. Typhimurium* in Trinidad. In Jamaica, *S. Austenborg* and *S. Kentucky* were

isolated from broilers [63]. Studies conducted on eggs and layer farms detected *S. Enteritidis*, *S. Mbandaka*, *S. Javiana*, *S. Caracas*, *S. Ohio*, *S. Braenderup* and *S. Georgia* in Trinidad [64] and *S. Enteritidis* in Barbados [65].

According to the Caribbean Public Health Agency (CARPHA) State of Public Health report [6], *S. Kentucky*, *S. Montevideo*, *S. Javiana* and *S. subspecies enterica*, which were found in the current study, were amongst the top 15 human *Salmonella* serotypes detected in the region as well as the most common *Salmonella* serotypes associated with human salmonellosis in Trinidad and Tobago between 2005–2012 and are therefore of public health significance. This is of importance since the most recent study in the country, prior to this project, was performed in 2006 [32] where only three serotypes (*Kiambu*, *Kentucky* and *Mbandaka*) were detected from the cottage poultry processors. In the current study, 10 serovars (*S. Javiana*, *S. Kentucky*, *S. Manhattan*, *S. Aberdeen*, *S. Bloomsbury*, *S. Schwarzengrund*, *S. Molade*, *S. Montevideo*, *S. San Diego*, *S. Westhampton*) were recovered. These serotypes may therefore have public health implications for consumers of improperly cooked chicken from the outlets studied.

Data from this study indicate the extent of contamination by *Salmonella* spp. in the selected outlets of cottage processors and supermarkets and the risk of salmonellosis occurring in consumers of contaminated, undercooked chicken meat sold at retail outlets in the country.

## Supporting information

**S1 Appendix. Sanitation score sheet for cottage poultry processor outlets.**  
(DOCX)

**S2 Appendix. Questionnaire administered at pluck shops.**  
(DOCX)

## Acknowledgments

We gratefully acknowledge the research funds provided by the University of the West Indies, St. Augustine Campus Research and Publication Fund Committee [Research grant #2660–457522]. The technical assistance of Alva Stewart-Johnson and Sannandan Samlal is appreciated. We also thank the cottage poultry processors and supermarket supervisors who participated in the study.

## Author Contributions

**Conceptualization:** Abiodun A. Adesiyun.

**Supervision:** Karla Georges.

**Writing – original draft:** Anisa S. Khan.

**Writing – review & editing:** Saed Rahaman, Woubit Abdela.

## References

1. Hoelzer K, Moreno Switt AI, Wiedmann M. Animal contact as a source of human non-typhoidal salmonellosis. *Vet Res.* 2011; 42:34. Epub 2011/02/18. <https://doi.org/10.1186/1297-9716-42-34> PMID: 21324103.
2. Majowicz SE, Musto J, Scallan E, Angulo FJ, Kirk M, O'Brien SJ, et al. The global burden of nontyphoidal *Salmonella* gastroenteritis. *Clin Infect Dis.* 2010; 50. <https://doi.org/10.1086/650733> PMID: 20158401
3. Barbour EK, Ayyash DB, Alturkistni W, Alyahiby A, Yaghmoor S, Iyer A, et al. Impact of sporadic reporting of poultry *Salmonella* serovars from selected developing countries. *J Infect Dev Ctries.* 2015; 9(1):1–7. Epub 2015/01/18. <https://doi.org/10.3855/jidc.5065> PMID: 25596565.

4. European Food Safety A, European Centre for Disease P, Control. The European Union summary report on trends and sources of zoonoses, zoonotic agents and food-borne outbreaks in 2016. *EFSA Journal*. 2017; 15(12):e05077–n/a. <https://doi.org/10.2903/j.efsa.2017.5077>
5. Basler C, Nguyen TA, Anderson TC, Hancock T, Behraves CB. Outbreaks of Human *Salmonella* Infections Associated with Live Poultry, United States, 1990–2014. *Emerg Infect Dis*. 2016; 22(10):1705–11. Epub 2016/09/21. <https://doi.org/10.3201/eid2210.150765> PMID: 27649489.
6. State of Public Health In the Caribbean Region Inaugural Report. Caribbean Public Health Agency, 2013.
7. Bae DH, Dessie HK, Baek HJ, Kim SG, Lee HS, Lee YJ. Prevalence and characteristics of *Salmonella* spp. isolated from poultry slaughterhouses in Korea. *J Vet Med Sci*. 2013; 75(9):1193–200. Epub 2013/05/15. <https://doi.org/10.1292/jvms.13-0093> PMID: 23665529.
8. Ta YT, Nguyen TT, To PB, Pham da X, Le HT, Alali WQ, et al. Prevalence of *Salmonella* on chicken carcasses from retail markets in Vietnam. *J Food Prot*. 2012; 75(10):1851–4. Epub 2012/10/10. <https://doi.org/10.4315/0362-028X.JFP-12-130> PMID: 23043836.
9. Badhe SR, Fairoze MN, Sudarshan S. Prevalence of food borne pathogens in market samples of chicken meat in Bangalore, India. *Indian J Anim Res* 2013; 47(3):262–4.
10. Nidaullah H, Abirami N, Shamila-Syuhada AK, Chuah LO, Nurul H, Tan TP, et al. Prevalence of *Salmonella* in poultry processing environments in wet markets in Penang and Perlis, Malaysia. *Vet World*. 2017; 10(3):286–92. Epub 2017/04/25. <https://doi.org/10.14202/vetworld.2017.286-292> PMID: 28435190.
11. Yang B, Xi M, Wang X, Cui S, Yue T, Hao H, et al. Prevalence of *Salmonella* on raw poultry at retail markets in China. *J Food Prot*. 2011; 74(10):1724–8. Epub 2011/10/19. <https://doi.org/10.4315/0362-028X.JFP-11-215> PMID: 22004821.
12. Jarquin C., Alvarez D., Morales O., Morales A. J., Lopez B., Donado P., Valencia M. F., Arevalo A., Munoz F., Walls I., Doyle M. P., and Alali W. Q. 2015. *Salmonella* on Raw Poultry in Retail Markets in Guatemala: Levels, Antibiotic Susceptibility, and Serovar Distribution. *J Food Prot*. 78(9):1642–50. <https://doi.org/10.4315/0362-028X.JFP-15-117> PMID: 26319717
13. Alali WQ, Gaydashov R, Petrova E, Panin A, Tugarinov O, Kulikovskii A, et al. Prevalence of *Salmonella* on retail chicken meat in Russian Federation. *J Food Prot*. 2012; 75(8):1469–73. Epub 2012/08/04. <https://doi.org/10.4315/0362-028X.JFP-12-080> PMID: 22856571.
14. Hardy B, Crilly N, Pendleton S, Andino A, Wallis A, Zhang N, et al. Impact of rearing conditions on the microbiological quality of raw retail poultry meat. *J Food Sci*. 2013; 78(8):M1232–5. <https://doi.org/10.1111/1750-3841.12212> PMID: 23957412.
15. Alvarez-Fernandez E, Alonso-Calleja C, Garcia-Fernandez C, Capita R. Prevalence and antimicrobial resistance of *Salmonella* serotypes isolated from poultry in Spain: comparison between 1993 and 2006. *Int J Food Microbiol*. 2012; 153(3):281–7. Epub 2012/01/03. <https://doi.org/10.1016/j.ijfoodmicro.2011.11.011> PMID: 22208955.
16. Meldrum RJ, Wilson IG. *Salmonella* and *Campylobacter* in United Kingdom retail raw chicken in 2005. *J Food Prot* 2007; 70(8):1937–9. <https://www.ncbi.nlm.nih.gov/pubmed/17803153>.
17. Zhao C., Ge B., De Villena J., Sudler R., Yeh E., Zhao S., White D. G., Wagner D., and Meng J. 2001. Prevalence of *Campylobacter* spp., *Escherichia coli*, and *Salmonella* serovars in retail chicken, turkey, pork, and beef from the Greater Washington, D.C., area. *Appl Environ Microbiol*. 67(12):5431–6. <https://www.ncbi.nlm.nih.gov/pubmed/11722889>
18. Antunes P, Mourao J, Campos J, Peixe L. Salmonellosis: the role of poultry meat. *Clin Microbiol Infect*. 2016; 22(2):110–21. Epub 2015/12/29. <https://doi.org/10.1016/j.cmi.2015.12.004> PMID: 26708671.
19. Lamas A, Fernandez-No IC, Miranda JM, Vazquez B, Cepeda A, Franco CM. Prevalence, molecular characterization and antimicrobial resistance of *Salmonella* serovars isolated from north western Spanish broiler flocks (2011–2015). *Poult Sci*. 2016; 95(9):2097–105. Epub 2016/05/05. <https://doi.org/10.3382/ps/pew150> PMID: 27143768.
20. Yang B, Cui Y, Shi C, Wang J, Xia X, Xi M, et al. Counts, serotypes, and antimicrobial resistance of *Salmonella* isolates on retail raw poultry in the People's Republic of China. *J Food Prot*. 2014; 77(6):894–902. Epub 2014/05/24. <https://doi.org/10.4315/0362-028X.JFP-13-439> PMID: 24853510.
21. Bada-Alamedji R, Fofana A, Seydi M, Akakpo AJ. Antimicrobial resistance of *Salmonella* isolated from poultry carcasses in Dakar (Senegal). *Braz J Microbiol*. 2006; 37:510–5.
22. Padungtod P, Kaneene JB. *Salmonella* in food animals and humans in northern Thailand. *Int J Food Microbiol*. 2006; 108(3):346–54. Epub 2006/02/21. <https://doi.org/10.1016/j.ijfoodmicro.2005.11.020> PMID: 16488041.

23. Park SH, Aydin M, Khatiwara A, Dolan MC, Gilmore DF, Bouldin JL, et al. Current and emerging technologies for rapid detection and characterization of *Salmonella* in poultry and poultry products. *Food Microbiol.* 2014; 38:250–62. <https://doi.org/10.1016/j.fm.2013.10.002> PMID: 24290649.
24. Cason JA, Cox NA, Buhr RJ, Richardson LJ. Comparison of the statistics of *Salmonella* testing of chilled broiler chicken carcasses by whole-carcass rinse and neck skin excision. *Poult Sci.* 2010; 89(9):2038–40. Epub 2010/08/17. <https://doi.org/10.3382/ps.2009-00478> PMID: 20709991.
25. Galarneau KD, Bailey RH, Wills RW. Agreement of 3 carcass rinse sampling methods (split carcass, repeat rinse, and adjacent pair) on the detection of *Salmonella* contamination in broiler carcasses. *Poult Sci.* 2015; 94(3):461–6. Epub 2015/02/24. <https://doi.org/10.3382/ps/pev001> PMID: 25700913.
26. Line JE, Stern NJ, Lattuada CP, Benson ST. Comparison of methods for recovery and enumeration of *Campylobacter* from freshly processed broilers. *J Food Prot.* 2001; 64(7):982–6. Epub 2001/07/18. PMID: 11456207.
27. Smith DP. Numbers of *Salmonella* recovered by sponge or low volume whole carcass rinse sampling of inoculated commercial turkey carcasses. *Poult Sci.* 2012; 91(8):2017–21. <https://doi.org/10.3382/ps.2011-01985>.
28. Bourassa DV, Holmes JM, Cason JA, Cox NA, Rigsby LL, Buhr RJ. Prevalence and Serogroup Diversity of *Salmonella* for Broiler Neck Skin, Whole Carcass Rinse, and Whole Carcass Enrichment Sampling Methodologies following Air or Immersion Chilling. *J Food Prot.* 2015; 78(11):1938–44. Epub 2015/11/12. <https://doi.org/10.4315/0362-028X.JFP-15-189> PMID: 26555515.
29. Cox NA, Buhr RJ, Smith DP, Cason JA, Rigsby LL, Bourassa DV, et al. Sampling naturally contaminated broiler carcasses for *Salmonella* by three different methods. *J Food Prot.* 2014; 77(3):493–5. Epub 2014/03/29. <https://doi.org/10.4315/0362-028X.JFP-13-320> PMID: 24674443.
30. Simmons M, Fletcher DL, Cason JA, Berrang ME. Recovery of *Salmonella* from retail broilers by a whole-carcass enrichment procedure. *J Food Prot.* 2003; 66(3):446–50. <https://doi.org/10.4315/0362-028X-66.3.446> PMID: 12636299
31. McEvoy JM, Nde CW, Sherwood JS, Logue CM. An evaluation of sampling methods for the detection of *Escherichia coli* and *Salmonella* on Turkey carcasses. *J Food Prot.* 2005; 68(1):34–9. Epub 2005/02/05. PMID: 15690801.
32. Rodrigo S, Adesiyun A, Asgarali Z, Swanston W. Occurrence of selected foodborne pathogens on poultry and poultry giblets from small retail processing operations in Trinidad. *J Food Prot.* 2006; 69(5):1096–105. PMID: 16715810
33. Van Poucke LS. *Salmonella*-TEK, a rapid screening method for *Salmonella* species in food. *Appl Environ Microbiol.* 1990; 56(4):924–7. PMID: 2187406
34. Gorski L. Selective enrichment media bias the types of *Salmonella enterica* strains isolated from mixed strain cultures and complex enrichment broths. *PLoS One.* 2012; 7(4):e34722. <https://doi.org/10.1371/journal.pone.0034722> PMID: 22496847
35. Foley SL, Johnson TJ, Ricke SC, Nayak R, Danzeisen J. *Salmonella* pathogenicity and host adaptation in chicken-associated serovars. *Microbiol Mol Biol Rev.* 2013; 77(4):582–607. <https://doi.org/10.1128/MMBR.00015-13> PMID: 24296573.
36. Vinueza-Burgos C, Cevallos M, Ron-Garrido L, Bertrand S, De Zutter L. Prevalence and Diversity of *Salmonella* Serotypes in Ecuadorian Broilers at Slaughter Age. *Public Library of Science One.* 2016; 11:e0159567. <https://doi.org/10.1371/journal.pone.0159567> PMID: 27414038
37. Foley SL, Nayak R, Hanning IB, Johnson TJ, Han J, Ricke SC. Population dynamics of *Salmonella enterica* serotypes in commercial egg and poultry production. *Appl Environ Microbiol.* 2011; 77(13):4273–9. Epub 2011/05/17. <https://doi.org/10.1128/AEM.00598-11> PMID: 21571882.
38. Betancor L, Pereira M, Martinez A, Giossa G, Fookes M, Flores K, et al. Prevalence of *Salmonella enterica* in poultry and eggs in Uruguay during an epidemic due to *Salmonella enterica* serovar Enteritidis. *J Clin Microbiol.* 2010; 48(7):2413–23. Epub 2010/05/21. <https://doi.org/10.1128/JCM.02137-09> PMID: 20484605.
39. Thomas A, Lallo CHO, Badrie N. Microbiological Evaluation of Broiler Carcasses, Wash and Rinse Water from Pluck Shops (Cottage Poultry Processors) in the County Nariva/Mayaro, Trinidad, Trinidad and Tobago, West Indies. *Tropicicultura.* 2006;( 3):135–42.
40. Dookeran MM, Baccus-Taylor GSH, Akingbala JO, Tameru B, Lammerding AM. Transmission of *Salmonella* on Broiler Chickens and Carcasses from Production to Retail in Trinidad and Tobago. *J Agri Biodiversity Res.* 2012; 1(5):78–84.
41. Thrusfield M. *Veterinary Epidemiology.* Third ed. UK: Blackwell Science Ltd, a Blackwell Publishing Company; 2007.

42. Gill CO, Badoni M, Moza LF, Barbut S, Griffiths MW. Microbiological sampling of poultry carcass portions by excision, rinsing, or swabbing. *J Food Prot.* 2005; 68(12):2718–20. Epub 2005/12/17. PMID: [16355849](https://pubmed.ncbi.nlm.nih.gov/16355849/).
43. Andrews W. Manual of food quality control. 4. Rev. 1. Microbiological analysis. Food and Drug Administration. FAO Food Nutr Pap. 1992; 14(4 Revis 1):1–338. Epub 1992/01/01. PMID: [1426189](https://pubmed.ncbi.nlm.nih.gov/1426189/).
44. Chuah LO, Shamila Syuhada AK, Mohamad Suhaimi I, Farah Hanim T, Rusul G. Genetic relatedness, antimicrobial resistance and biofilm formation of *Salmonella* isolated from naturally contaminated poultry and their processing environment in northern Malaysia. *Food Res Int.* 2018; 105:743–51. Epub 2018/02/13. <https://doi.org/10.1016/j.foodres.2017.11.066> PMID: [29433269](https://pubmed.ncbi.nlm.nih.gov/29433269/).
45. Moe AZ, Paulsen P, Pichpol D, Fries R, Irsigler H, Baumann MPO, et al. Prevalence and Antimicrobial Resistance of *Salmonella* Isolates from Chicken Carcasses in Retail Markets in Yangon, Myanmar. *J Food Prot.* 2017; 80(6):947–51. Epub 2017/05/04. <https://doi.org/10.4315/0362-028X.JFP-16-407> PMID: [28463083](https://pubmed.ncbi.nlm.nih.gov/28463083/).
46. FAO/WHO. *Salmonella* and *Campylobacter* in chicken meat. Rome: Food and Agriculture Organization of the United Nations/World Health Organization, 2009.
47. Donado-Godoy P, Clavijo V, Leon M, Arevalo A, Castellanos R, Bernal J, et al. Counts, serovars, and antimicrobial resistance phenotypes of *Salmonella* on raw chicken meat at retail in Colombia. *J Food Prot.* 2014; 77(2):227–35. Epub 2014/02/05. <https://doi.org/10.4315/0362-028X.JFP-13-276> PMID: [24490916](https://pubmed.ncbi.nlm.nih.gov/24490916/).
48. Adesiyun A, Ojo MO, Mohammed K, Garcia G. Frequency of isolation of campylobacters and salmonellae from live broilers reared by contract farmers in Trinidad. *Bull anim health prod Afr.* 1994; (42):167–72.
49. Rivera-Perez W, Barquero-Calvo E, Zamora-Sanabria R. *Salmonella* contamination risk points in broiler carcasses during slaughter line processing. *J Food Prot.* 2014; 77(12):2031–4. Epub 2014/12/05. <https://doi.org/10.4315/0362-028X.JFP-14-052> PMID: [25474047](https://pubmed.ncbi.nlm.nih.gov/25474047/).
50. Cox NA, Richardson L.J., Cason J.A., Buhr R.J., Vizzier-Thaxton Y., Smith D.P., Fedorka-Cray P.J., Romanenghi C.P., Pereira L.V.B., Doyle M.P. Comparison of neck skin excision and WCR sampling methods for microbiological evaluation of broiler carcasses before and after immersion chilling. *J Food Prot.* 2010; 73(5):976–80. PMID: [20501052](https://pubmed.ncbi.nlm.nih.gov/20501052/)
51. Davies PR, Turkson PK, Funk JA, Nichols MA, Ladely SR, Fedorka-Cray P.J. Comparison of methods for isolating *Salmonella* bacteria from faeces of naturally infected pigs. *J Appl Microbiol.* 2000; 89(1):169–77. Epub 2000/08/17. <https://doi.org/10.1046/j.1365-2672.2000.01101.x> PMID: [10945794](https://pubmed.ncbi.nlm.nih.gov/10945794/).
52. Lyle CH, Annandale CH, Gouws J, Morley PS. Comparison of two culture techniques used to detect environmental contamination with *Salmonella enterica* in a large-animal hospital. *J S Afr Vet Assoc.* 2015; 86(1):E1–5. Epub 2015/08/26. <https://doi.org/10.4102/jsava.v86i1.1292> PMID: [26304139](https://pubmed.ncbi.nlm.nih.gov/26304139/).
53. Schonenbrucher V, Mallinson ET, Bulte M. A comparison of standard cultural methods for the detection of foodborne *Salmonella* species including three new chromogenic plating media. *Int J Food Microbiol.* 2008; 123(1–2):61–6. Epub 2008/01/15. <https://doi.org/10.1016/j.ijfoodmicro.2007.11.064> PMID: [18192050](https://pubmed.ncbi.nlm.nih.gov/18192050/).
54. Bohara MS. Bacteriological quality of broiler chicken meat sold at local market of Kanchanpur district Nepal. *Int J Life Sciences Tech.* 2017; 10(9):79–86.
55. Ta YT, Nguyen TT, To PB, Pham da X, Le HT, Thi GN, et al. Quantification, serovars, and antibiotic resistance of *Salmonella* isolated from retail raw chicken meat in Vietnam. *J Food Prot.* 2014; 77(1):57–66. Epub 2014/01/11. <https://doi.org/10.4315/0362-028X.JFP-13-221> PMID: [24405999](https://pubmed.ncbi.nlm.nih.gov/24405999/).
56. Giombelli A, Cavani R, Gloria MB. Evaluation of three sampling methods for the microbiological analysis of broiler carcasses after immersion chilling. *J Food Prot.* 2013; 76(8):1330–5. Epub 2013/08/03. <https://doi.org/10.4315/0362-028X.JFP-13-004> PMID: [23905787](https://pubmed.ncbi.nlm.nih.gov/23905787/).
57. Huda N, NidaUllah H, Omar AKM, Rosma A, Sohni S. Analysis of *Salmonella* Contamination in Poultry Meat at Various Retailing, Different Storage Temperatures and Carcass Cuts—A Literature Survey. *Int J Poult Sci.* 2016; 15(3):111–20. <https://doi.org/10.3923/ijps.2016.111.120>
58. Ahmed TA, Saeed S. A. M., Hussien HA. Evaluation of poultry meat safety based on ISO 22000 as food safety management system. *Pak J Nutr.* 2013; 12(2):121–9.
59. James C, Vincenz C, de Andrade Lima TI, James SJ. The primary chilling of poultry carcasses—a review. *Int J Refrig.* 2006; 29(6):847–62. <https://doi.org/10.1016/j.ijrefrig.2005.08.003>
60. Morris GK, Wells JG. *Salmonella* contamination in a poultry-processing plant. *Appl Microbiol.* 1970; 19(5):795–9. Epub 1970/05/01. PMID: [5463577](https://pubmed.ncbi.nlm.nih.gov/5463577/).
61. Palumbo SA, Klein P, Capra J, Eblen S, Miller AJ. Comparison of excision and swabbing sampling methods to determine the microbiological quality of swine carcass surfaces. *Food Microbiol.* 1999; 16(5):459–64. <https://doi.org/10.1006/fmic.1998.0259>



62. Sarlin LL, Barnhart ET, Caldwell DJ, Moore RW, Byrd JA, Caldwell DY, et al. Evaluation of alternative sampling methods for *Salmonella* critical control point determination at broiler processing. *Poult Sci*. 1998; 77(8):1253–7. Epub 1998/08/26. <https://doi.org/10.1093/ps/77.8.1253> PMID: 9706097.
63. Curtello S. Prevalence of *Salmonella* Organisms in Poultry and Poultry Environments in Jamaica. *Br Microbiol Res J*. 2013; 3(4):461–9. <https://doi.org/10.9734/bmrj/2013/4255>
64. Adesiyun A, Offiah N, Seepersadsingh N, Rodrigo S, Lashley V, Musai L, et al. Microbial health risk posed by table eggs in Trinidad. *Epidemiol Infect*. 2005; 133(6):1049–56. Epub 2005/11/09. <https://doi.org/10.1017/S0950268805004565> PMID: 16274501.
65. Aimey V, Hunte K, Whitehall P, Sanford B, Trotman M, Delgado A, et al. Prevalence of and examination of exposure factors for *Salmonella* on commercial egg-laying farms in Barbados. *Prev Vet Med*. 2013; 110(3–4):489–96. Epub 2013/01/30. <https://doi.org/10.1016/j.prevetmed.2012.12.009> PMID: 23357068.
